# Supplementary material for: Correlation between piezoelectric and magnetic properties of Fe and Sm co-substituted potassium niobate piezoelectric ceramics
Source: Royal Society of Chemistry journal article supplement (doi:10.1039/c8cp01971a), 2018-01-01
Supplement: c8cp01971a1.pdf [file c8cp01971a1.pdf]

## Correlation between piezoelectric and magnetic properties of Fe and Sm co-substituted potassium niobate piezoelectric ceramics

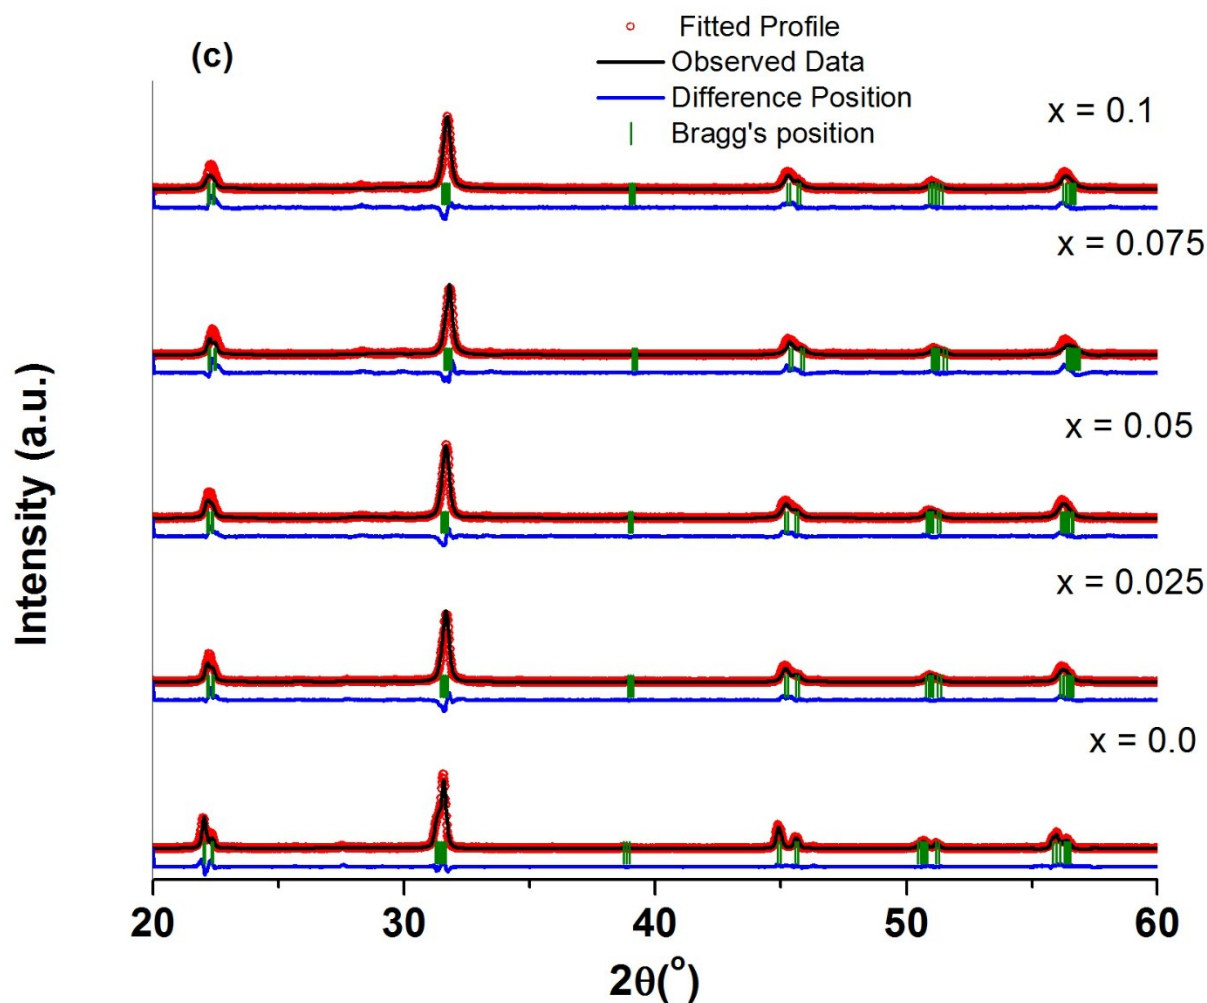

Fig. S1 Rietveld refinement of the studied samples at room temperature using Amm2 symmetry.

Table S1 showing the Rietveld refined parameters for the studied samples

|             | $R_p$ | $R_{wp}$ | $R_e$ | Bragg R Factor | Rf factor |
|-------------|-------|----------|-------|----------------|-----------|
| $x = 0.0$   | 16.1  | 20.4     | 5.2   | 2.51           | 3.49      |
| $x = 0.025$ | 15.4  | 17.2     | 6.09  | 3.51           | 3.59      |
| $x = 0.05$  | 15.9  | 16.8     | 6.52  | 2.70           | 3.11      |
| $x = 0.075$ | 22.0  | 22.4     | 7.00  | 3.17           | 5.25      |
| $x = 0.1$   | 21.6  | 24.1     | 7.95  | 3.32           | 4.04      |

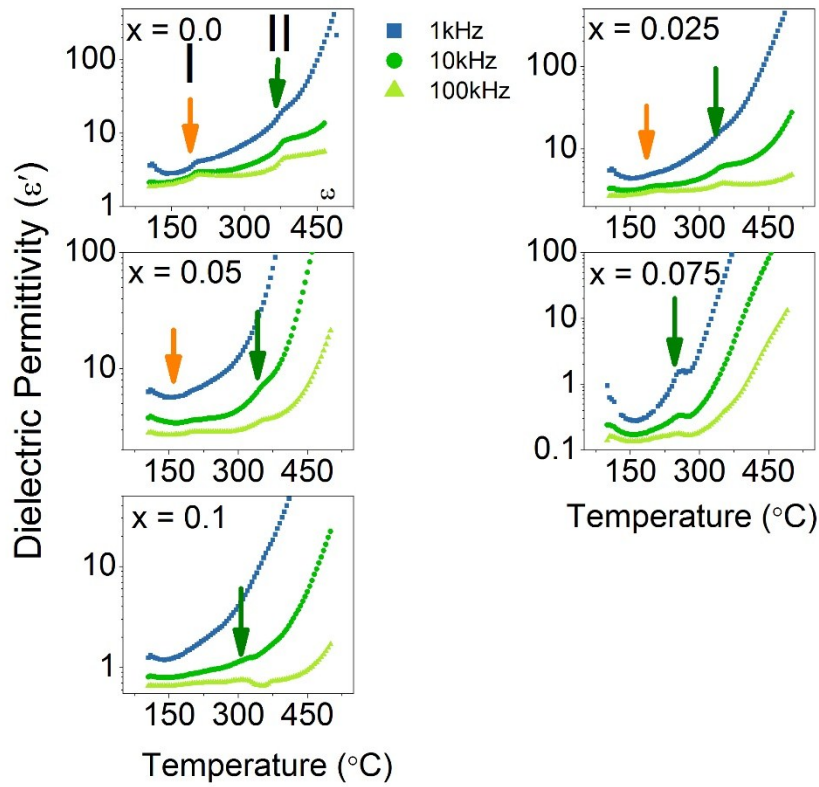

Fig. S2  $\epsilon'$  -T plots plotted at different frequencies and it is found that there are two kinks marked as I with orange and II with green arrows up to  $x = 0.05$ . Whereas, in  $x = 0.075$  and  $x = 0.1$  samples, a shoulder is observed at a temperature lower than the temperatures observed up to  $x = 0.05$ .

Table S2: Lattice parameters and atomic positions for the high temperature XRD data for x = 0.05 sample (calcined sample)

| Temp  | Symmetry       | a(Å)    | b(Å)    | c(Å)    | Element name | x   | y       | z       |
|-------|----------------|---------|---------|---------|--------------|-----|---------|---------|
| 240°C | Amm2           | 4.0277  | 5.7258  | 5.7582  | K/Sm         | 0   | 0       | 0.50158 |
|       |                |         |         |         | Nb/Fe        | 0.5 | 0       | 0.95301 |
|       |                |         |         |         | O1           | 0   | 0       | 0.95948 |
|       |                |         |         |         | O2           | 0.5 | 0.29912 | 0.61389 |
| 325°C | P4mm           | 4.0127  | 4.0127  | 4.0397  | K/Sm         | 0.5 | 0.5     | 0.53658 |
|       |                |         |         |         | Nb/Fe        | 0   | 0       | 0.04117 |
|       |                |         |         |         | O1           | 0.5 | 0       | 0.02526 |
|       |                |         |         |         | O2           | 0   | 0       | 0.65447 |
| 370°C | Pm $\bar{3}$ m | 4.05502 | 4.05502 | 4.05502 | K/Sm         | 0   | 0       | 0       |
|       |                |         |         |         | Nb/Fe        | 0.5 | 0.5     | 0.5     |
|       |                |         |         |         | O1           | 0   | 0.5     | 0.5     |
|       |                |         |         |         | O2           | 0.5 | 0       | 0.5     |
